# Supplementary material for: Solid-state fermentation by Aspergillus niger and Trichoderma koningii improves the quality of tea dregs for use as feed additives
Source: PubMed Central journal article supplement (PMC8589212; doi:10.1371/journal.pone.0260045), 2021-11-12
Supplement: pone.0260045.s001.pdf [file pone.0260045.s001.pdf]

**Batch Data Path** H:\MassHunter\Data\2021\08\AF\20210824\QuantResults\20210824.batch.bin  
**Analysis Time** 8/25/2021 2:10 PM **Analyst Name** KMKZ-EA03-02\Admin  
**Report Time** 8/25/2021 2:27 PM **Reporter Name** KMKZ-EA03-02\Admin  
**Last Calib Update** 8/25/2021 2:10 PM **Batch State** Processed

AFB1

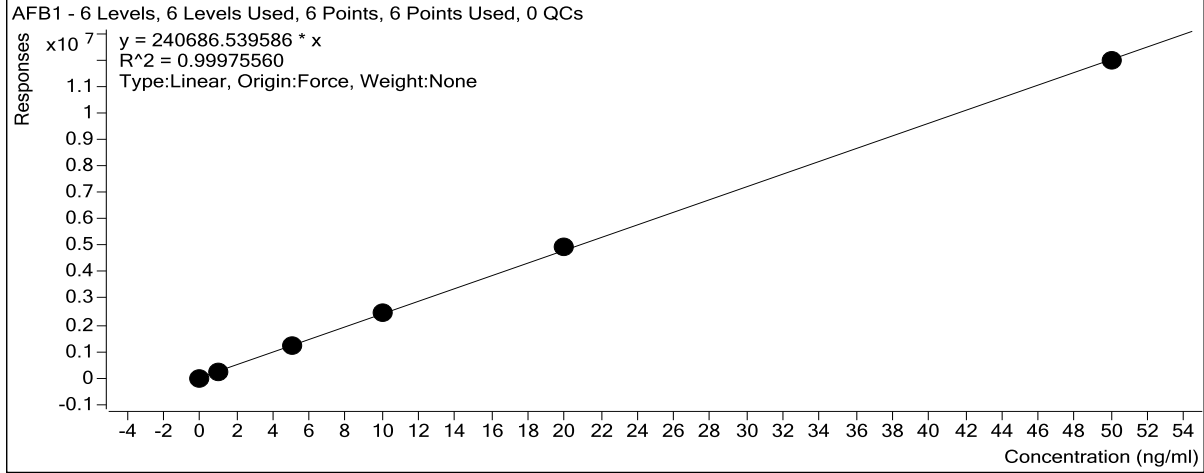

| Data  | Acq Time        | Type        | Name                           | Compound | ISTD | RT    | Final Conc    | Resp     | ISTD Resp |
|-------|-----------------|-------------|--------------------------------|----------|------|-------|---------------|----------|-----------|
| 003.d | 2021/8/24 11:43 | Sample      | SJKB                           | AFB1     |      | 3.977 | 0.0000 ng/ml  | 0        |           |
| 004.d | 2021/8/24 11:50 | Sample      | GCKB                           | AFB1     |      | 3.977 | 0.0000 ng/ml  | 0        |           |
| 007.d | 2021/8/24 12:10 | Calibration | STD-1                          | AFB1     |      | 3.955 | 0.0252 ng/ml  | 6059     |           |
| 008.d | 2021/8/24 12:16 | Calibration | STD-2                          | AFB1     |      | 3.955 | 0.8574 ng/ml  | 206362   |           |
| 009.d | 2021/8/24 12:23 | Calibration | STD-3                          | AFB1     |      | 3.955 | 4.9468 ng/ml  | 1190618  |           |
| 010.d | 2021/8/24 12:30 | Calibration | STD-4                          | AFB1     |      | 3.955 | 10.3227 ng/ml | 2484529  |           |
| 011.d | 2021/8/24 12:37 | Calibration | STD-5                          | AFB1     |      | 3.955 | 20.4938 ng/ml | 4932589  |           |
| 012.d | 2021/8/24 12:43 | Calibration | STD-6                          | AFB1     |      | 3.955 | 49.7461 ng/ml | 11973218 |           |
| 014.d | 2021/8/24 12:57 | Sample      | WS2104719006-ZK                | AFB1     |      | 3.955 | 5.0413 ng/ml  | 1213373  |           |
| 028.d | 2021/8/24 16:32 | Sample      | WS2104719006 -TDs              | AFB1     |      | 4.325 | 0.0000 ng/ml  | 0        |           |
| 029.d | 2021/8/24 16:39 | Sample      | WS2104719007 -T. koningii FTDs | AFB1     |      | 4.336 | 0.0000 ng/ml  | 0        |           |
| 030.d | 2021/8/24 16:46 | Sample      | WS2104719008 -A.niger FTDs     | AFB1     |      | 4.056 | 0.0000 ng/ml  | 0        |           |
| 032.d | 2021/8/24 17:01 | Sample      | STD-3-RR                       | AFB1     |      | 3.955 | 4.2267 ng/ml  | 1017320  |           |

SJKB

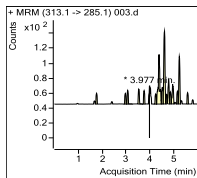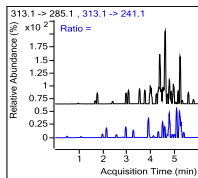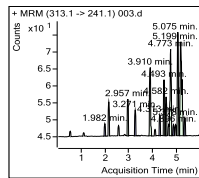

GCKB

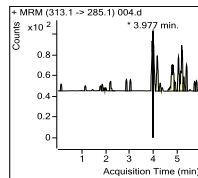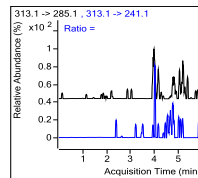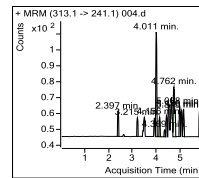

STD-1

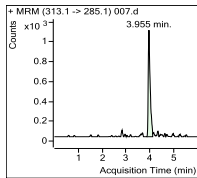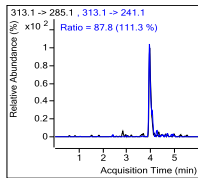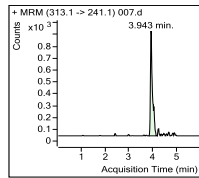

STD-2

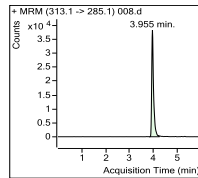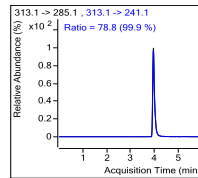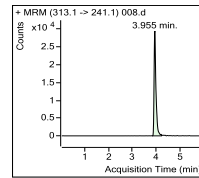

# Quantitative Analysis Sample Report

## STD-3

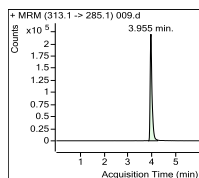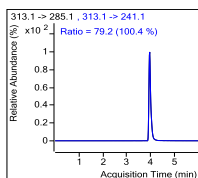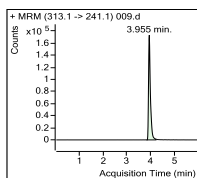

## STD-4

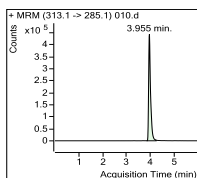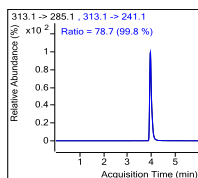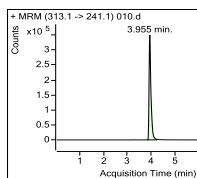

## STD-5

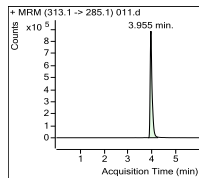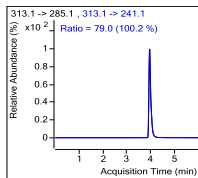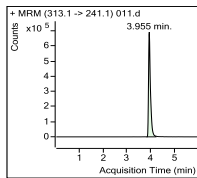

## STD-6

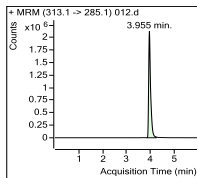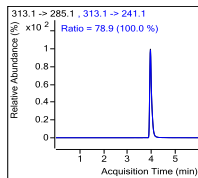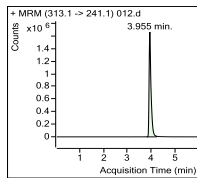

## WS2104719006-ZK

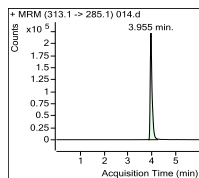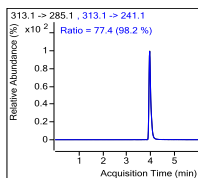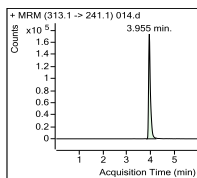

## WS2104719006

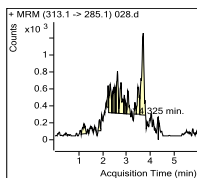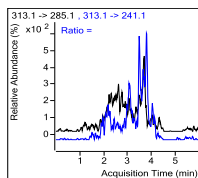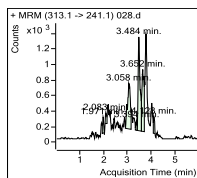

## WS2104719007

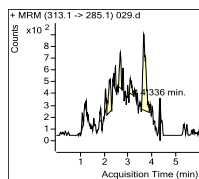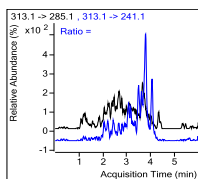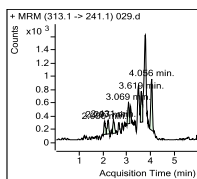

## WS2104719008

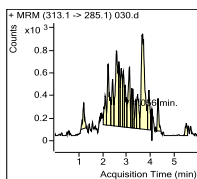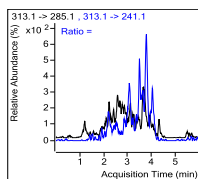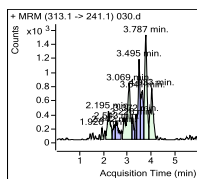

## STD-3-RR

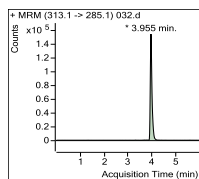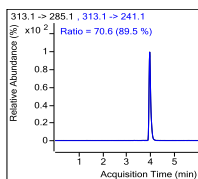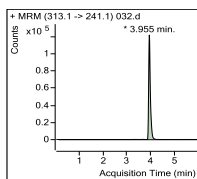

# T-2 toxin

Batch Name: XT-20210901.dab

Page 1 of 1

|    | Sample Name                        | Sample Type     | Acquisition Date    | Analyte Peak Name | Analyte Peak Area (counts) | Analyte Peak Height (cps) | Analyte Concentration (ng/mL) | Calculated Concentration (ng/mL) | Accuracy (%) |
|----|------------------------------------|-----------------|---------------------|-------------------|----------------------------|---------------------------|-------------------------------|----------------------------------|--------------|
| 1  | std-10ppb                          | Standard        | 9/4/2021 4:07:22 PM | T-2               | 2.38e+004                  | 3.91e+003                 | 10.0                          | 11.5                             | 115.         |
| 2  | std-20ppb                          | Standard        | 9/4/2021 4:12:46 PM | T-2               | 4.59e+004                  | 7.09e+003                 | 20.0                          | 22.2                             | 111.         |
| 3  | std-30ppb                          | Standard        | 9/4/2021 4:18:14 PM | T-2               | 7.02e+004                  | 1.25e+004                 | 30.0                          | 34.0                             | 113.         |
| 4  | std-40ppb                          | Standard        | 9/4/2021 4:23:40 PM | T-2               | 8.78e+004                  | 1.50e+004                 | 40.0                          | 42.4                             | 106.         |
| 5  | std-50ppb                          | Standard        | 9/4/2021 4:29:07 PM | T-2               | 9.20e+004                  | 1.43e+004                 | 50.0                          | 44.5                             | 89.0         |
| 6  | add-20ppb                          | Quality Control | 9/4/2021 4:34:31 PM | T-2               | 4.38e+004                  | 7.17e+003                 | 20.0                          | 21.2                             | 106.         |
| 7  | kb                                 | Unknown         | 9/4/2021 4:39:59 PM | T-2               | 0.00e+000                  | 0.00e+000                 | N/A                           | No Peak                          | N/A          |
| 8  | 2108032831-1 <small>-TDs</small>   | Unknown         | 9/4/2021 4:45:27 PM | T-2               | 0.00e+000                  | 0.00e+000                 | N/A                           | No Peak                          | N/A          |
| 9  | 2108032831-2                       | Unknown         | 9/4/2021 4:50:53 PM | T-2               | 0.00e+000                  | 0.00e+000                 | N/A                           | No Peak                          | N/A          |
| 10 | 2108032832-1 <small>-T, kb</small> | Unknown         | 9/4/2021 4:56:21 PM | T-2               | 0.00e+000                  | 0.00e+000                 | N/A                           | No Peak                          | N/A          |
| 11 | 2108032832-2 <small>-FTDs</small>  | Unknown         | 9/4/2021 5:01:48 PM | T-2               | 0.00e+000                  | 0.00e+000                 | N/A                           | No Peak                          | N/A          |
| 12 | 2108032833-1                       | Unknown         | 9/4/2021 5:07:13 PM | T-2               | 0.00e+000                  | 0.00e+000                 | N/A                           | No Peak                          | N/A          |
| 13 | 2108032833-2 <small>-Ani</small>   | Unknown         | 9/4/2021 5:12:42 PM | T-2               | 0.00e+000                  | 0.00e+000                 | N/A                           | No Peak                          | N/A          |

郑爽柔

刘福友

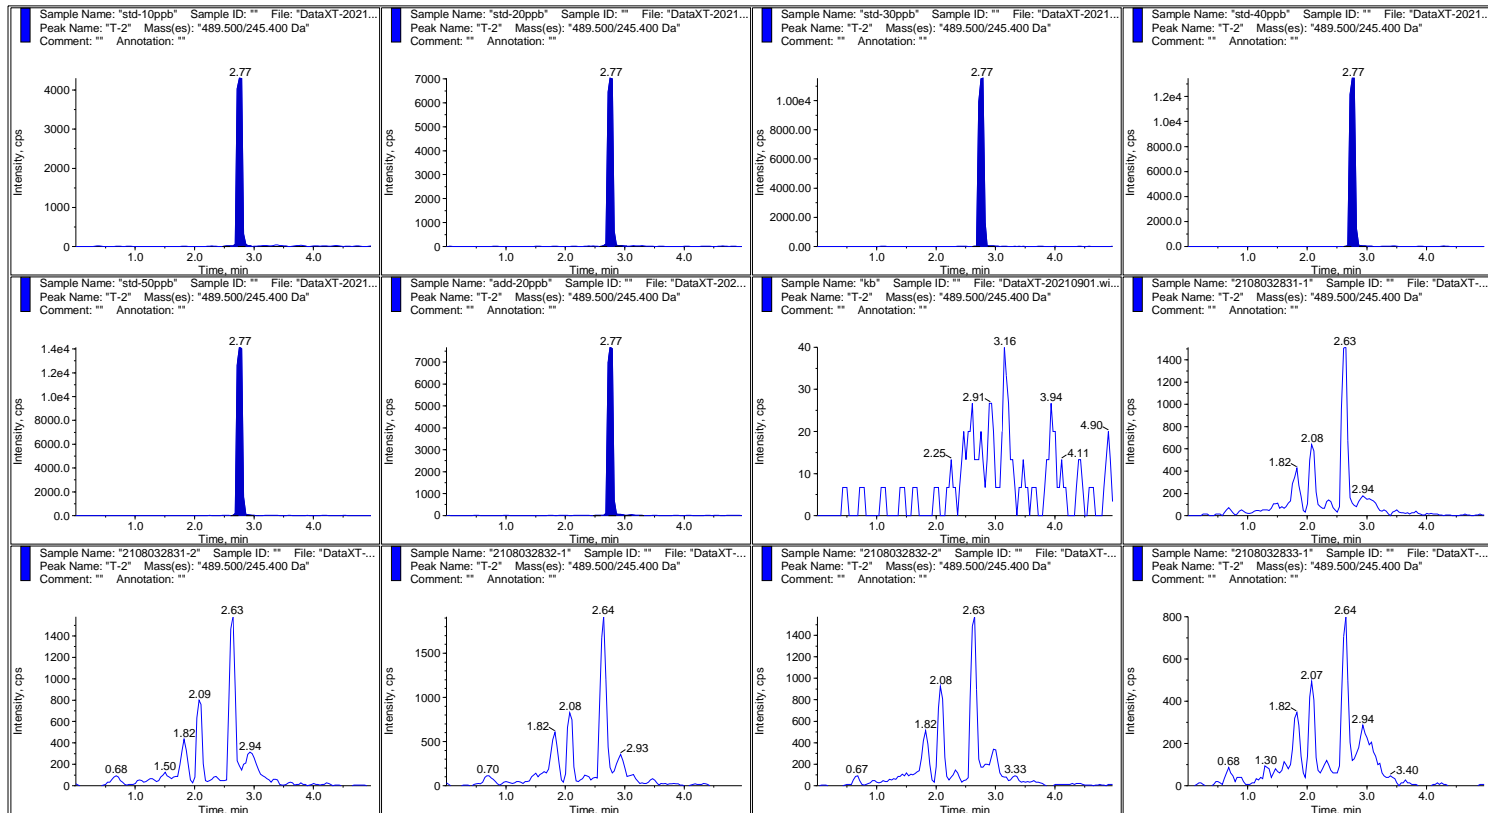

郑奕柔

刘福友

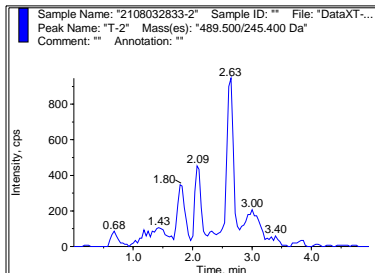

郑奕柔

刘福友

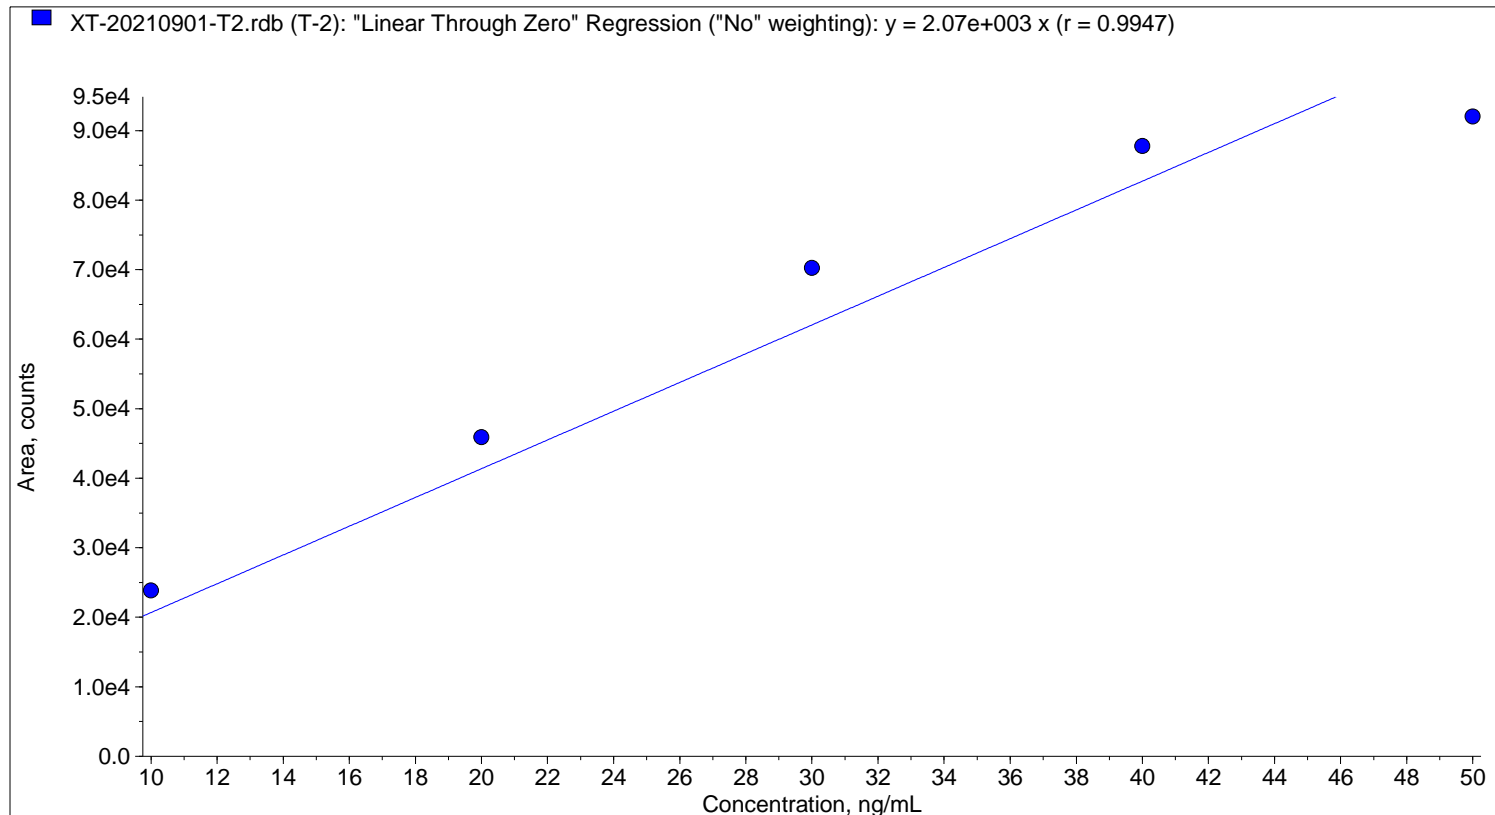

郑奕柔

刘福友

**Batch Data Path** H:\MassHunter\Data\2021\08\ZEN\20210824\QuantResults\20210824.batch.bin  
**Analysis Time** 8/25/2021 2:32 PM **Analyst Name** KMKZ-EA03-02\Admin  
**Report Time** 8/25/2021 2:33 PM **Reporter Name** KMKZ-EA03-02\Admin  
**Last Calib Update** 8/25/2021 2:32 PM **Batch State** Processed

ZEN

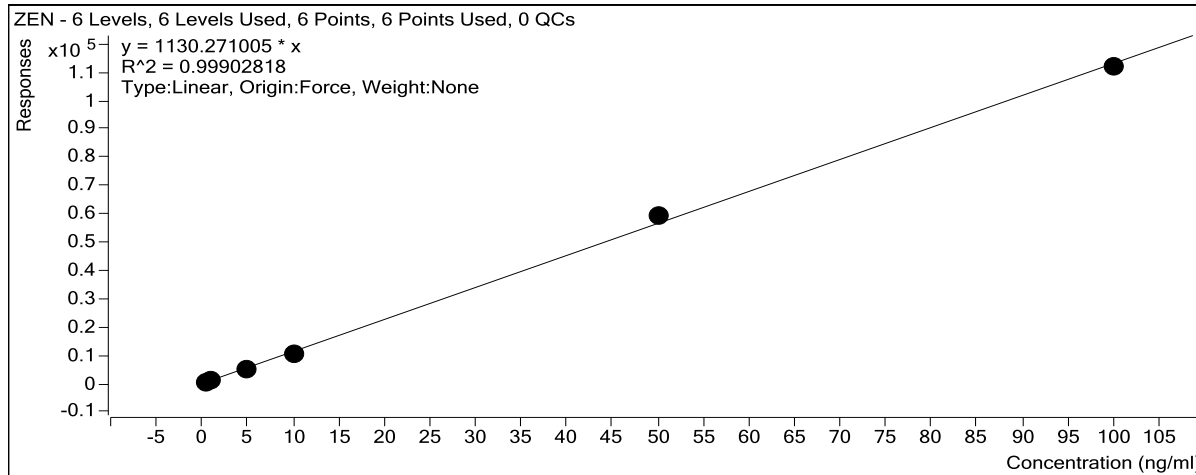

| Data  | Acq Time        | Type        | Name                              | Compou<br>nd | ISTD | RT    | Final<br>Conc | Resp   | ISTD<br>Resp |
|-------|-----------------|-------------|-----------------------------------|--------------|------|-------|---------------|--------|--------------|
| 002.d | 2021/8/24 17:17 | Sample      | SJKB                              | ZEN          |      | 3.017 | 0.0000 ng/ml  | 0      |              |
| 003.d | 2021/8/24 17:22 | Sample      | GCKB                              | ZEN          |      | 3.226 | 0.0000 ng/ml  | 0      |              |
| 005.d | 2021/8/24 17:34 | Calibration | STD-1                             | ZEN          |      | 3.151 | 0.3363 ng/ml  | 380    |              |
| 006.d | 2021/8/24 17:40 | Calibration | STD-2                             | ZEN          |      | 3.151 | 0.8812 ng/ml  | 996    |              |
| 007.d | 2021/8/24 17:45 | Calibration | STD-3                             | ZEN          |      | 3.151 | 4.5018 ng/ml  | 5088   |              |
| 008.d | 2021/8/24 17:51 | Calibration | STD-4                             | ZEN          |      | 3.151 | 9.5068 ng/ml  | 10745  |              |
| 009.d | 2021/8/24 17:57 | Calibration | STD-5                             | ZEN          |      | 3.151 | 52.4388 ng/ml | 59270  |              |
| 010.d | 2021/8/24 18:02 | Calibration | STD-6                             | ZEN          |      | 3.151 | 98.8569 ng/ml | 111735 |              |
| 012.d | 2021/8/24 18:14 | Sample      | WS2104719006-ZK                   | ZEN          |      | 3.151 | 58.6614 ng/ml | 66303  |              |
| 013.d | 2021/8/24 18:20 | Sample      | WS2104719006 -TDs                 | ZEN          |      | 3.143 | 0.0000 ng/ml  | 0      |              |
| 014.d | 2021/8/24 18:25 | Sample      | WS2104719007 -T. koningii<br>FTDs | ZEN          |      | 3.151 | 0.0000 ng/ml  | 0      |              |
| 015.d | 2021/8/24 18:31 | Sample      | WS2104719008 -A.niger<br>FTDs     | ZEN          |      | 3.117 | 0.0000 ng/ml  | 0      |              |
| 023.d | 2021/8/24 19:24 | Sample      | STD-4-R                           | ZEN          |      | 3.159 | 9.9469 ng/ml  | 11243  |              |

SJKB

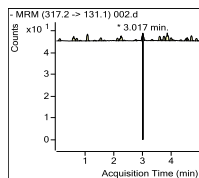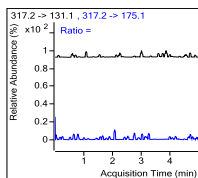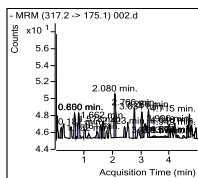

GCKB

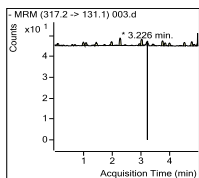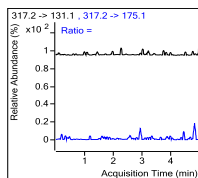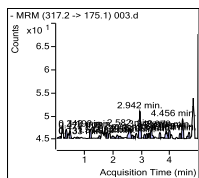

STD-1

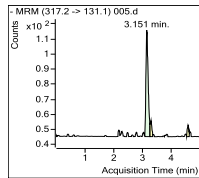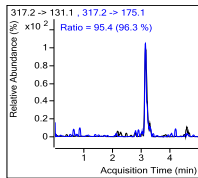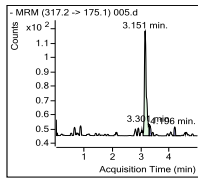

STD-2

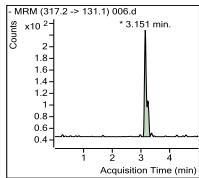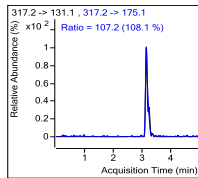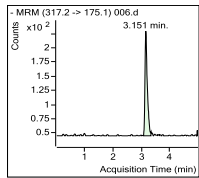

# Quantitative Analysis Sample Report

## STD-3

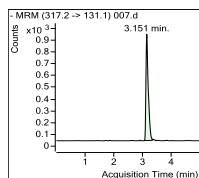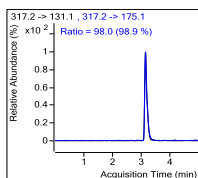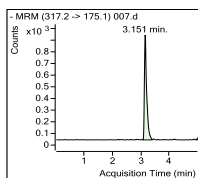

## STD-4

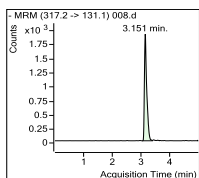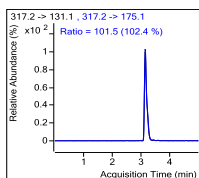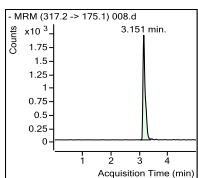

## STD-5

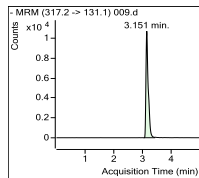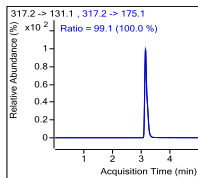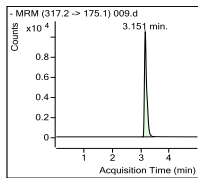

## STD-6

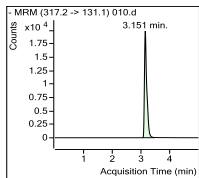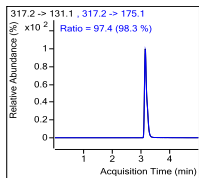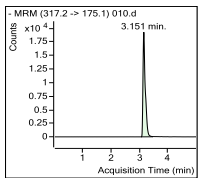

## WS2104719006-ZK

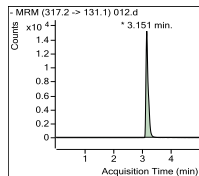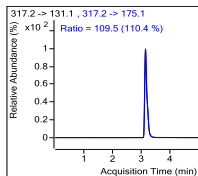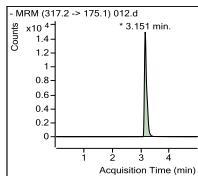

## WS2104719006

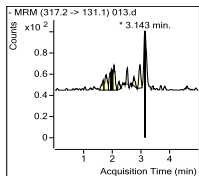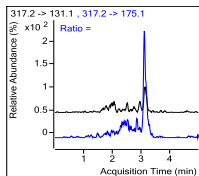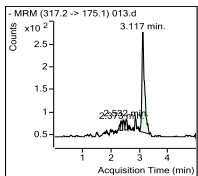

## WS2104719007

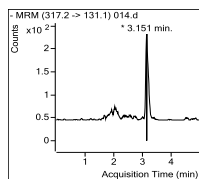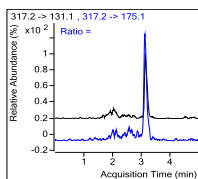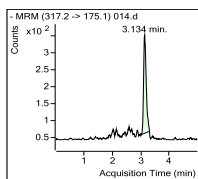

## WS2104719008

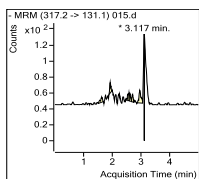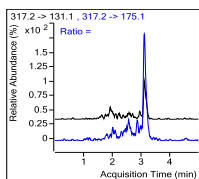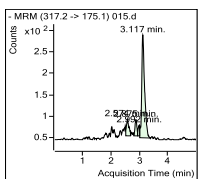

## STD-4-R

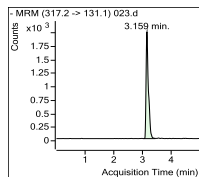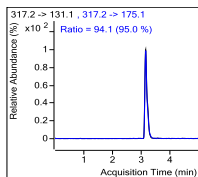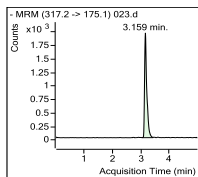



# Deoxynivalenol

## 样品统计报告

序列 采集者 test 序列 采集日期 9/1/2021 9:33:26 AM

采集方法 呕吐毒素.amx 数据 分析方法 \*呕吐毒素.pmx

采集方法修改日期 6/20/2021 11:16:20 AM 仪器 名称 KMKZEA01-01

化合物: 呕吐毒素

信号: DAD1A

预期保留时间: 5.924

相关系数: 0.999681

残留: 1.73705

RF RSD%:

公式:  $y = ax + b$

a: 78.81751

b: 0.44612

c: 0.00000

d:

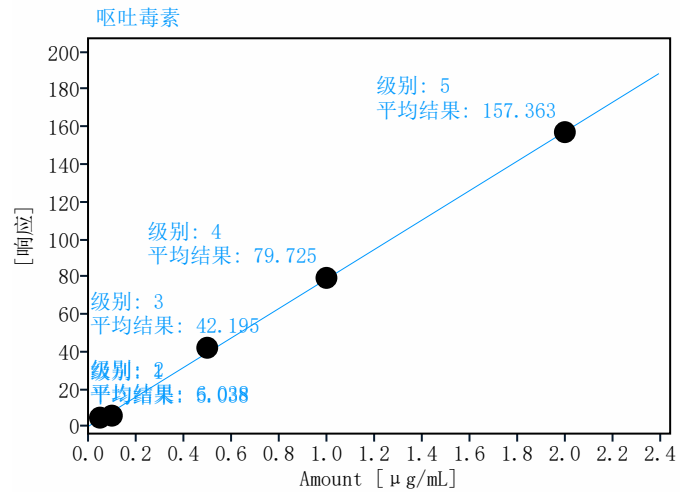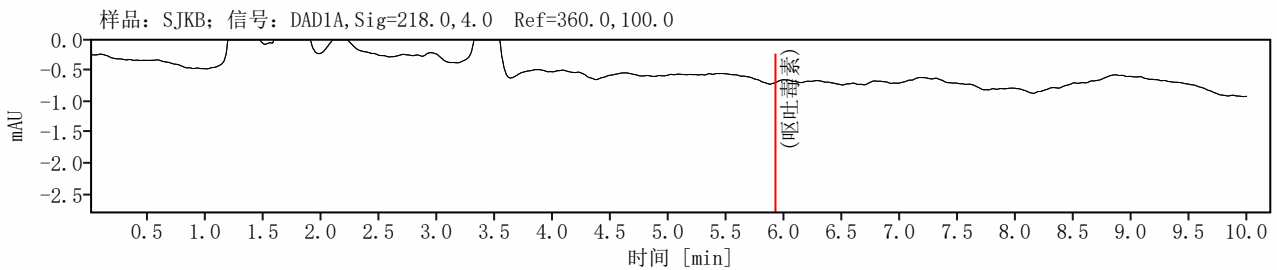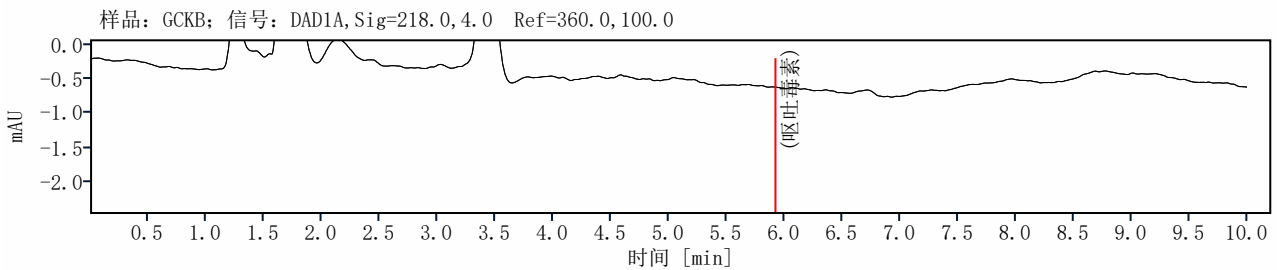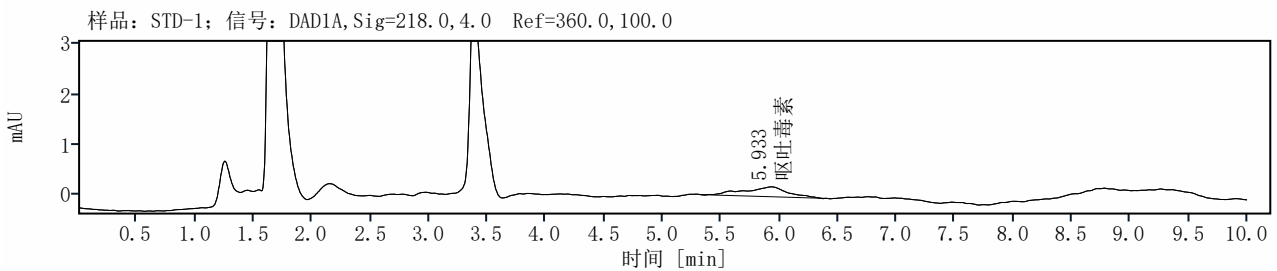

检验员:

复核人:

复核日期:

# 样品统计报告

样品: STD-2; 信号: DAD1A, Sig=218.0, 4.0 Ref=360.0, 100.0

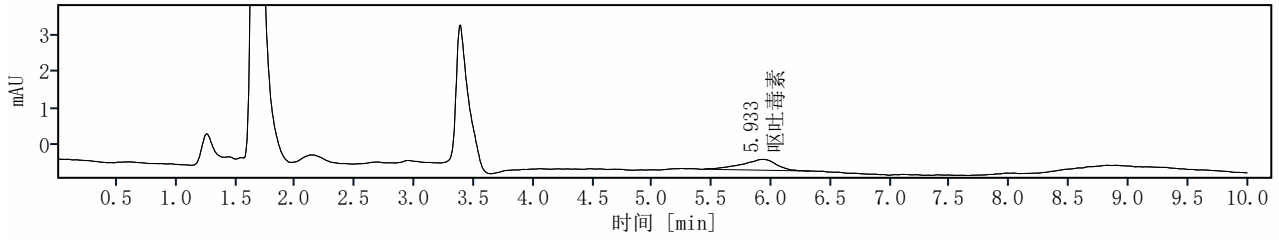

样品: STD-3; 信号: DAD1A, Sig=218.0, 4.0 Ref=360.0, 100.0

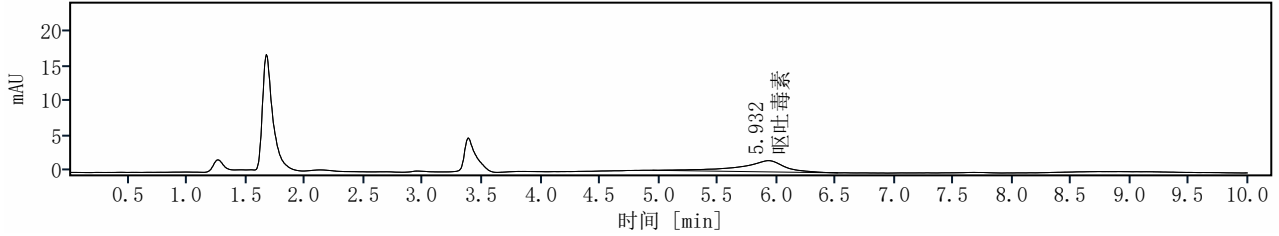

样品: STD-4; 信号: DAD1A, Sig=218.0, 4.0 Ref=360.0, 100.0

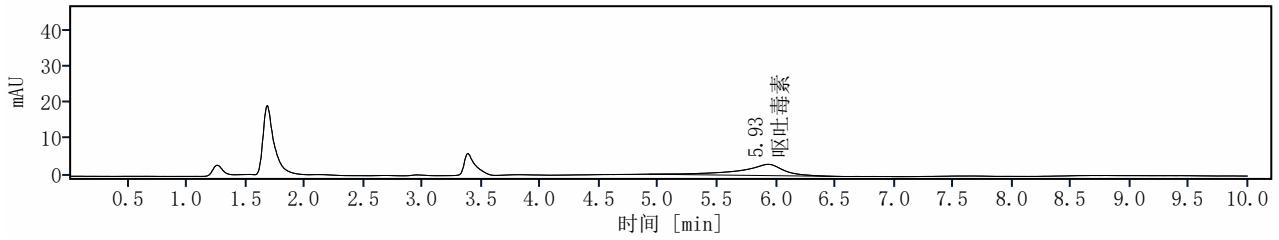

样品: STD-5; 信号: DAD1A, Sig=218.0, 4.0 Ref=360.0, 100.0

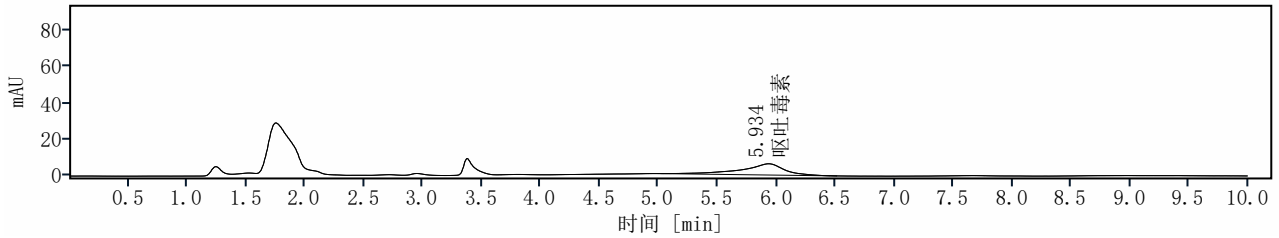

样品: STD-6; 信号: DAD1A, Sig=218.0, 4.0 Ref=360.0, 100.0

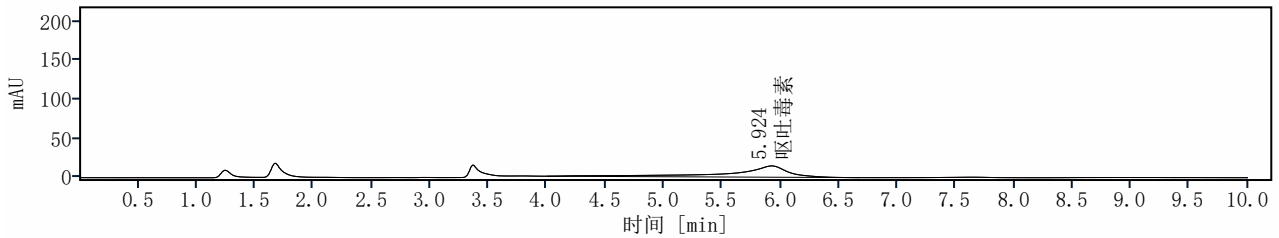

样品: WS2104896001; 信号: DAD1A, Sig=218.0, 4.0 Ref=360.0, 100.0

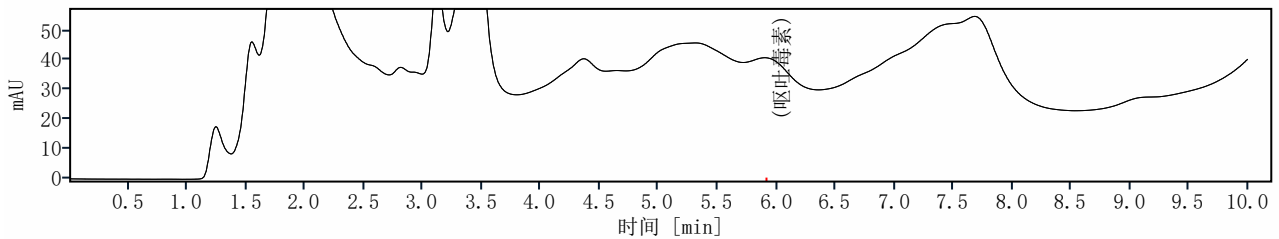

检验员:

复核人:

复核日期:

# 样品统计报告

样品: WS2104896002; 信号: DAD1A, Sig=218.0, 4.0 Ref=360.0, 100.0

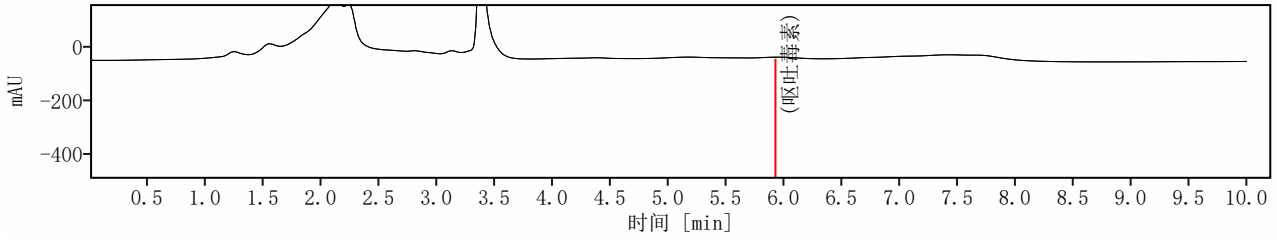

样品: WS2104896003; 信号: DAD1A, Sig=218.0, 4.0 Ref=360.0, 100.0

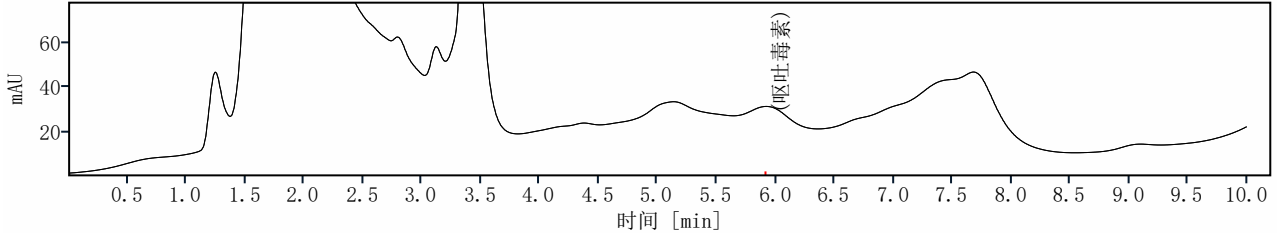

样品: STD-4-R; 信号: DAD1A, Sig=218.0, 4.0 Ref=360.0, 100.0

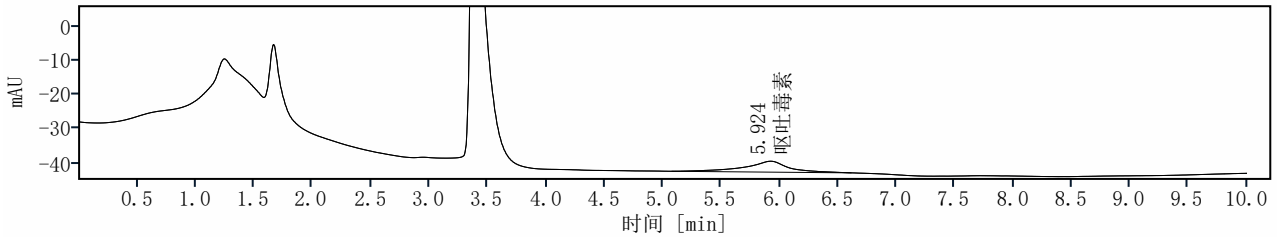

| 名称           | 呕吐毒素                 |  | 保留时间 [min] | 面积      | 峰高 [pA] | 采集日期                | 含量 [μg/mL] |
|--------------|----------------------|--|------------|---------|---------|---------------------|------------|
| 样品名称         | 样品瓶号                 |  |            |         |         |                     |            |
| SJKB         | 31                   |  | 5.924      | 0.000   | 0.000   | 09/01/2021 09:35:15 | 0.0000     |
| GCKB         | 32                   |  | 5.924      | 0.000   | 0.000   | 09/01/2021 09:47:05 | 0.0000     |
| STD-1        | 33                   |  | 5.933      | 5.038   | 0.198   | 09/01/2021 09:58:49 | 0.0583     |
| STD-2        | 34                   |  | 5.933      | 6.038   | 0.299   | 09/01/2021 10:10:35 | 0.0710     |
| STD-3        | 35                   |  | 5.932      | 42.195  | 1.620   | 09/01/2021 10:22:22 | 0.5297     |
| STD-4        | 36                   |  | 5.930      | 79.725  | 3.098   | 09/01/2021 10:34:14 | 1.0059     |
| STD-5        | 37                   |  | 5.934      | 157.363 | 6.228   | 09/01/2021 10:45:57 | 1.9909     |
| STD-6        | 38                   |  | 5.924      | 491.203 | 14.487  | 09/01/2021 10:57:42 | 6.2265     |
| WS2104896001 | -TDs 39              |  | 5.924      | 0.000   | 0.000   | 09/01/2021 11:21:14 | 0.0000     |
| WS2104896002 | -T. koningii FTDs 40 |  | 5.924      | 0.000   | 0.000   | 09/01/2021 11:33:02 | 0.0000     |
| WS2104896003 | -A.niger FTDs 41     |  | 5.924      | 0.000   | 0.000   | 09/01/2021 11:44:48 | 0.0000     |
| STD-4-R      | 36                   |  | 5.924      | 83.286  | 3.187   | 09/01/2021 12:31:48 | 1.0510     |

检验员:

复核人:

复核日期:

# Ochratoxin

分析者 : System Administrator  
设备编号 : GZ20210203  
样品架号 : 1  
样品瓶号 : 1  
进样体积 : 20 uL  
数据文件名 : 试剂空白.lcd  
方法文件名 : 20210902.lcm  
批处理文件名 : 20210902-1.lcb  
分析日期 : 2021/9/2 12:44:33

汇总(每个化合物)  
试剂空白.lcd

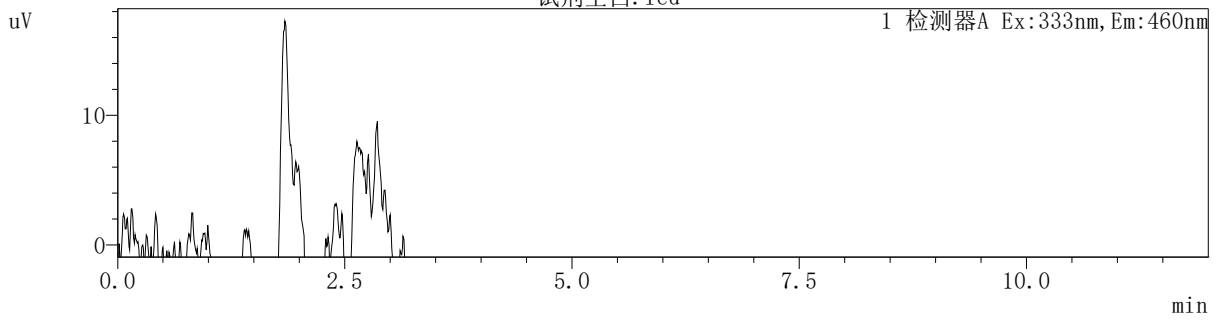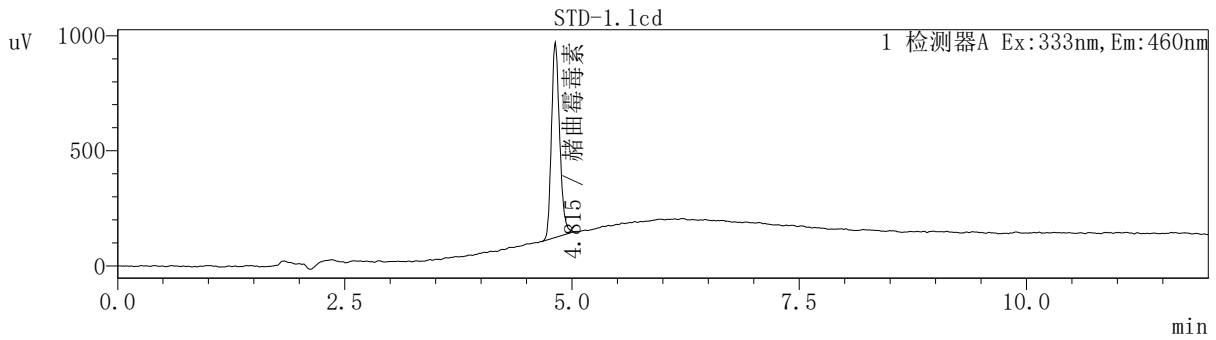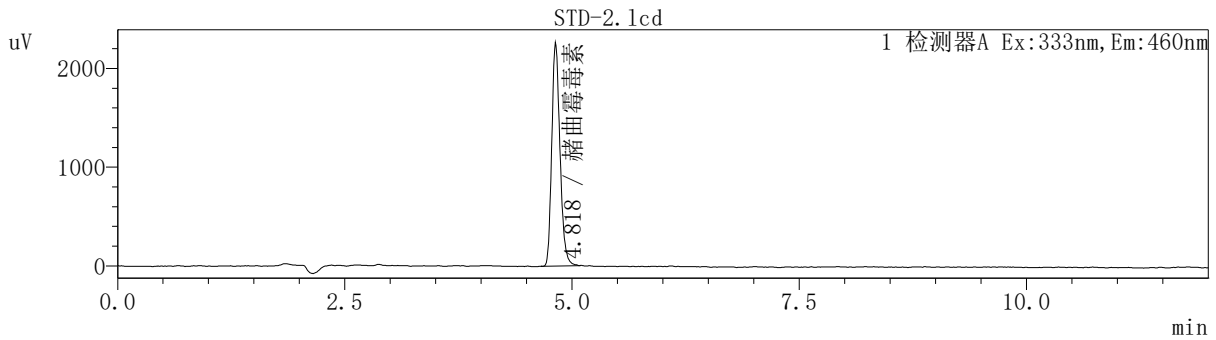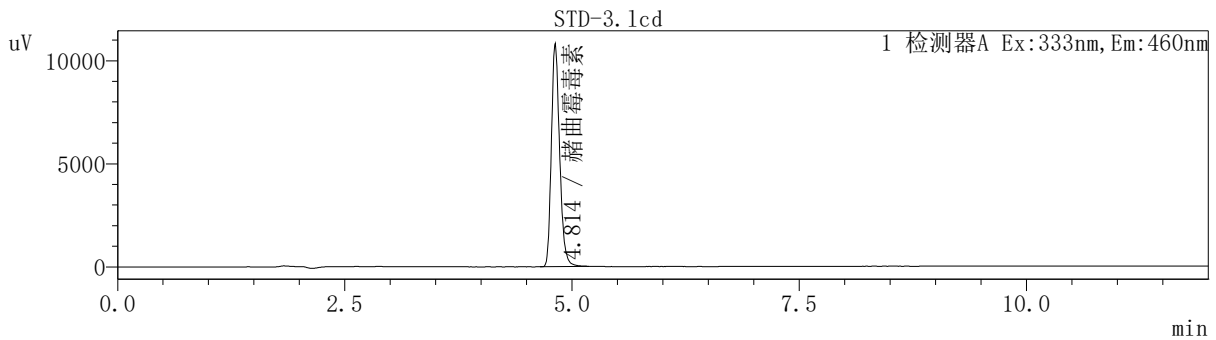

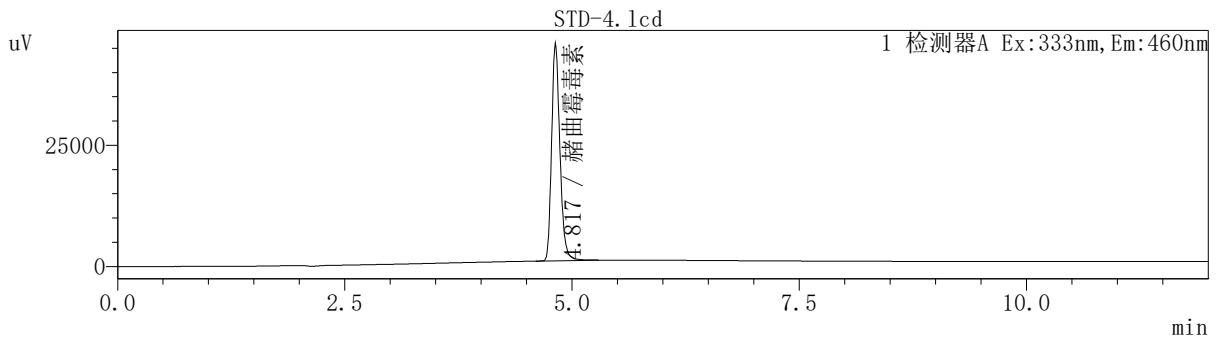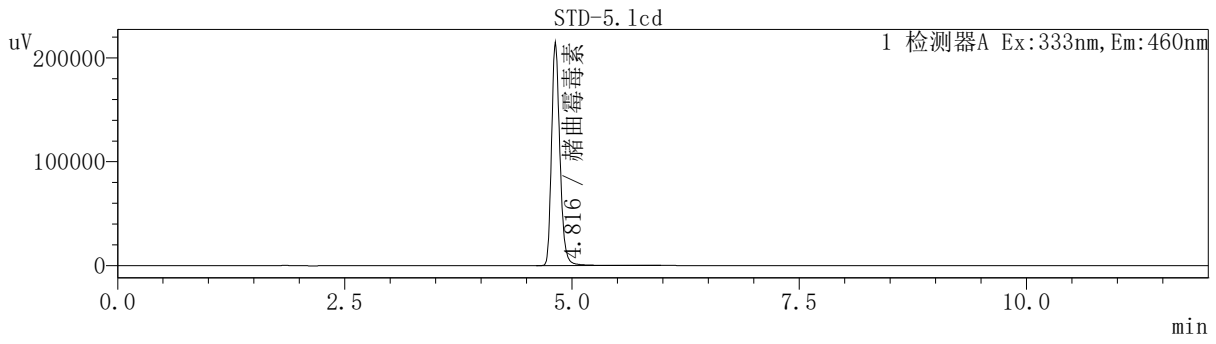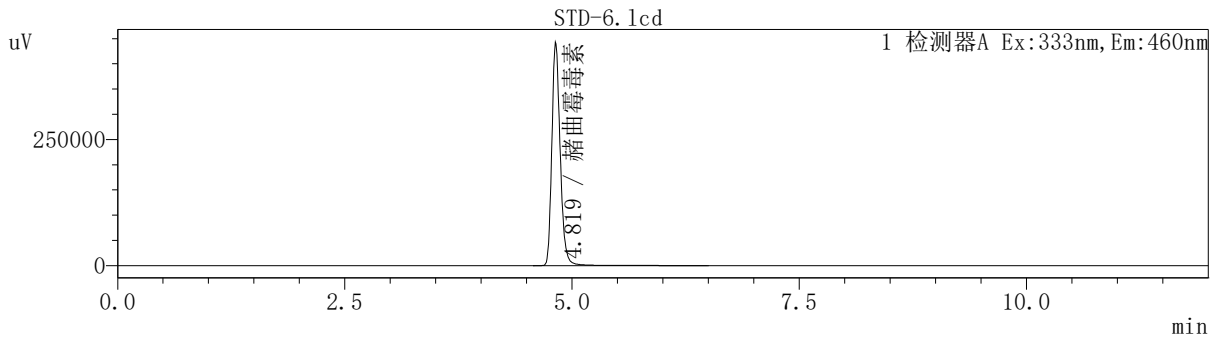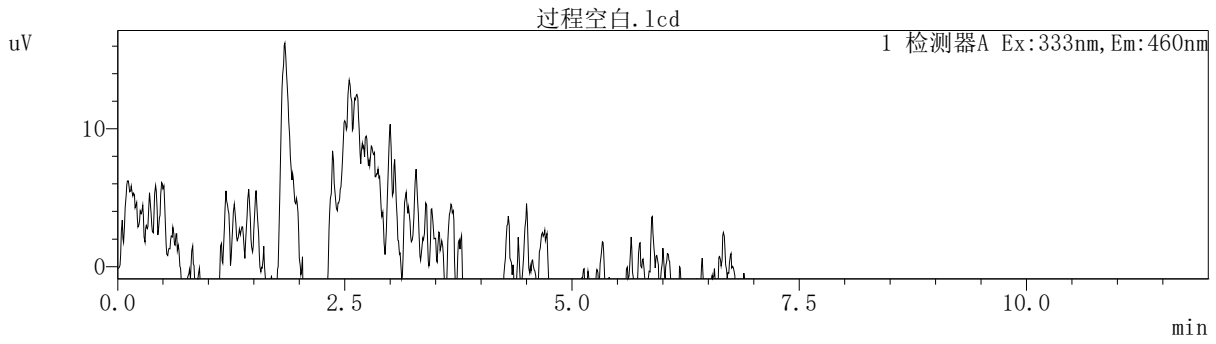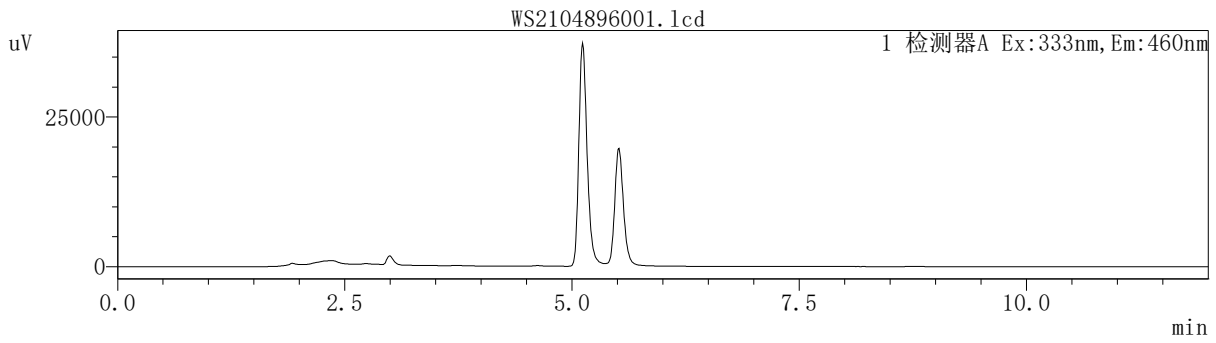

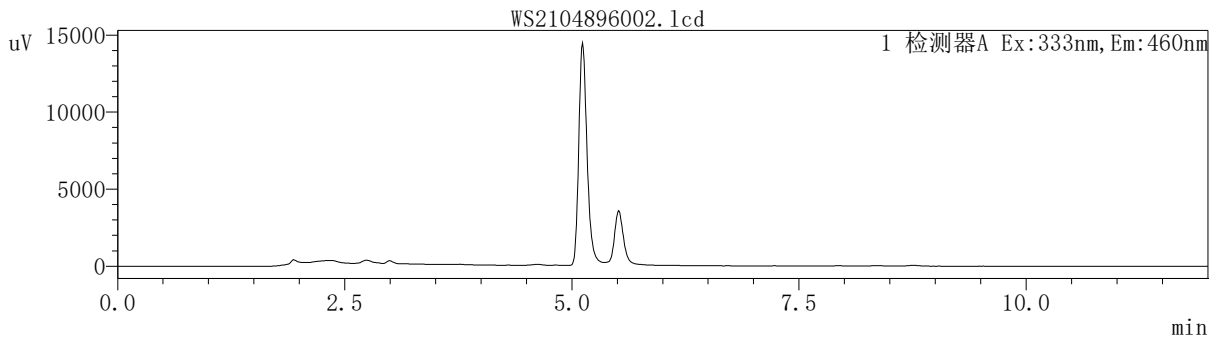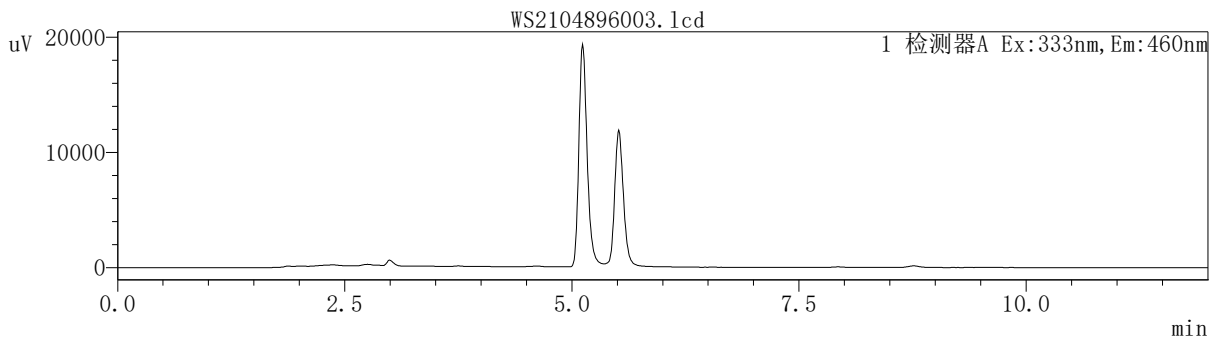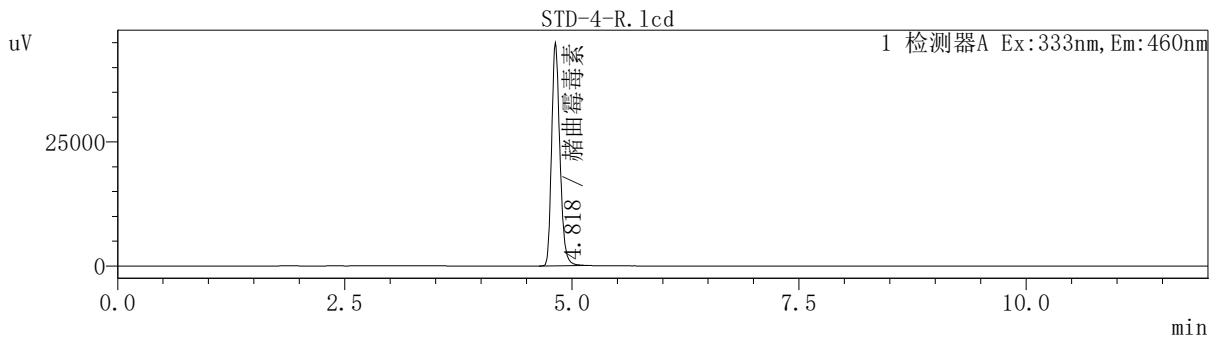

<< 检测器A >>  
ID#1 化合物名: 赭曲霉毒素

| 标题                           | 保留时间  | 面积      | 浓度       | 浓度单位  | 样品瓶号 | 分析日期     | 分析时间     |
|------------------------------|-------|---------|----------|-------|------|----------|----------|
| 试剂空白.lcd                     | 0.000 | 0       | 0.0000   | ng/ml | 1    | 2021/9/2 | 12:44:33 |
| STD-1.lcd                    | 4.815 | 5310    | 0.1887   | ng/ml | 3    | 2021/9/2 | 12:57:07 |
| STD-2.lcd                    | 4.818 | 14228   | 0.5056   | ng/ml | 4    | 2021/9/2 | 13:09:40 |
| STD-3.lcd                    | 4.814 | 68494   | 2.4342   | ng/ml | 5    | 2021/9/2 | 13:22:13 |
| STD-4.lcd                    | 4.817 | 284548  | 10.1127  | ng/ml | 6    | 2021/9/2 | 13:34:47 |
| STD-5.lcd                    | 4.816 | 1372043 | 48.7619  | ng/ml | 7    | 2021/9/2 | 13:47:20 |
| STD-6.lcd                    | 4.819 | 2830906 | 100.6094 | ng/ml | 8    | 2021/9/2 | 13:59:54 |
| 过程空白.lcd                     | 0.000 | 0       | 0.0000   | ng/ml | 2    | 2021/9/2 | 14:12:28 |
| WS2104896001.lcd -TDS        | 0.000 | 0       | 0.0000   | ng/ml | 12   | 2021/9/2 | 15:02:44 |
| WS2104896002.lcd -T.koningii | 0.000 | 0       | 0.0000   | ng/ml | 13   | 2021/9/2 | 15:15:18 |
| WS2104896003.lcd -A.niger    | 0.000 | 0       | 0.0000   | ng/ml | 14   | 2021/9/2 | 15:27:53 |
| STD-4-R.lcd -FTDS            | 4.818 | 283508  | 10.0758  | ng/ml | 6    | 2021/9/2 | 15:40:27 |

校准曲线

ID号 : 1  
 化合物名 : 赭曲霉毒素  
 定量算法 : 外标法  
 校准曲线公式 :  $f(x)=28137.6*x+0$   
 相关系数(R)=0.9998883 拟合度(R<sup>2</sup>)=0.9997765 剩余值的平方和(RSS)=1.521233e+009  
 平均 RF 2.776827e+004 RF标准偏差 7.694208e+002 RF相对标准偏差RSD 2.770863  
 校准曲线类型 : 直线  
 原点 : 通过  
 加权方法 : 无  
 检测器名 : 检测器A

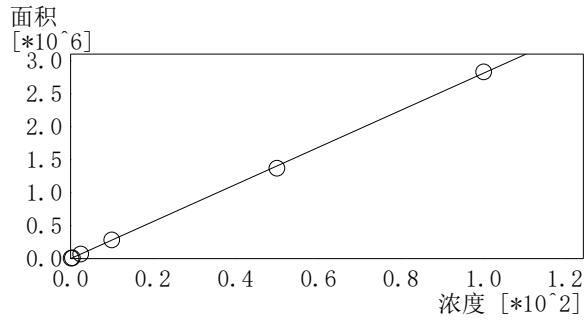

| # | 浓度(比率) | 平均面积    |
|---|--------|---------|
| 1 | 0.2    | 5310    |
| 2 | 0.5    | 14228   |
| 3 | 2.5    | 68494   |
| 4 | 10     | 284548  |
| 5 | 50     | 1372043 |
| 6 | 100    | 2830906 |
